# Supplementary material for: Phase-engineered two-dimensional MoO3/MoS2 hybrid nanostructures enable efficient indoor organic photovoltaics
Source: Royal Society of Chemistry journal article supplement (doi:10.1039/d3ta04608g), 2023-01-01
Supplement: d3ta04608g1.pdf [file d3ta04608g1.pdf]

## Supporting Information

### **Phase-engineered two-dimensional MoO<sub>3</sub>/MoS<sub>2</sub> hybrid nanostructures enable efficient indoor organic photovoltaics**

Muhammad Ahsan Saeed<sup>a, 1</sup>, Muhammad Faizan<sup>b, 1</sup>, Tae Hyuk Kim<sup>a</sup>, Hyungju Ahn<sup>c</sup>, *Ji-Young Kim*<sup>d</sup>, Kyung-Wan Nam<sup>b, \*</sup>, Jae Won Shim<sup>a, \*</sup>

<sup>a</sup>School of Electrical Engineering, Korea University, Seoul 02841, Republic of Korea

<sup>b</sup>Department of Energy & Materials Engineering, Dongguk University, Seoul 04620, Republic of Korea

<sup>c</sup>Pohang Accelerator Laboratory, POSTECH, Pohang, 37673, Republic of Korea

<sup>d</sup>Advanced Analysis & Data Center, Korea Institute of Science and Technology (KIST), Seoul 02792, South Korea

\*Corresponding authors.

E-mail address: [knam@dongguk.edu](mailto:knam@dongguk.edu) (K.-W. Nam)

E-mail: [jwshim19@korea.ac.kr](mailto:jwshim19@korea.ac.kr) (J. W. Shim)

<sup>1</sup>Muhammad Ahsan Saeed and Muhammad Faizan contributed equally to this work.

## Experimental Details

### *FDTD Simulation*

Optical simulations were performed to obtain the highest  $J_{SC}$  value using Maxwell equation-based FDTD simulations (Lumerical Inc., Republic of Korea). A conventional plane-wave source was used to send waves to the photovoltaic device structure. Periodic boundary conditions were assumed on the x-axis and y-axis, whereas perfect matching-layer boundary conditions were estimated along the z-axis. A 3D frequency-domain power monitor was used to quantify the optical absorption in the PM6:Y6: TMSs active layers. A laboratory-made script was used to determine the maximum simulated  $J_{SC}$  values under indoor illumination conditions.

### *Charge Mobility Measurements*

Hole- and electron-only OPV devices were constructed using the device structures ITO/2PACz/active layer/MoO<sub>x</sub>/Ag and ITO/ZnO/active layer/PDINO/Al, respectively. The hole and electron charge mobilities were estimated using the Mott–Gurney expression:

$$J = \frac{9}{8} \varepsilon_0 \varepsilon_r \mu \frac{V^2}{L^3}$$

where  $J$  denotes current density,  $\varepsilon_0$  is the permittivity of free space ( $8.85 \times 10^{-12} \text{ C} \cdot \text{V}^{-1} \cdot \text{m}^{-1}$ ),  $\varepsilon_r$  is the relative permittivity of the transport medium (assuming that of 3.0),  $\mu$  is the charge carrier mobility,  $V$  is the internal potential in the device, and  $L$  is the thickness of the active layer.

### *Parasitic Resistance Analysis*

The equivalent circuit diode model can be solved analytically using the Shockley equation, and the related photovoltaic parameters  $J_{SC}$  and  $V_{OC}$  can be expressed as follows:

$$J_{sc} = - \frac{1}{1 + \frac{R_s}{R_p}} \left\{ J_{ph} - J_o \left( \exp \left( \frac{|J_{sc}| R_s A}{n k T} \right) - 1 \right) \right\} \quad (\text{Eq. S1})$$

$$V_{OC} = n \frac{kT}{e} \ln \left\{ 1 + \frac{J_{ph}}{J_o} \left( 1 - \frac{V_{OC}}{J_{ph} R_p A} \right) \right\} \quad (\text{Eq. S2})$$

where  $J_{ph}$  denotes the photocurrent density,  $J_o$  is the reverse saturation current density,  $R_s$  and  $R_p$  are the parasitic series and shunt resistances, respectively,  $e$  is the elementary charge,  $n$  is the ideality factor,  $T$  is the temperature,  $k$  is the Boltzmann constant ( $8.617 \times 10^{-5} \text{ eV/K}$ ), and  $A$  is the active area of the OPV.

Similarly, FF ( $J_{\max} \times V_{\max} / J_{\text{SC}} \times V_{\text{OC}}$ ) can be expressed as a function of the normalized  $V_{\text{OC}}$  ( $v_{\text{OC}} = eV_{\text{OC}}/nkT$ ), normalized  $R_{\text{S}}$  ( $r_{\text{S}} = R_{\text{S}}/R_{\text{CH}}$ ), and normalized  $R_{\text{P}}$  ( $r_{\text{P}} = R_{\text{P}}/R_{\text{CH}}$ ), where the characteristic resistance ( $R_{\text{CH}}$ ) is defined as  $V_{\text{OC}}/(J_{\text{SC}}A)$ . From this, the semi-empirical expression obtained for FF is given as

$$FF = \left\{ \frac{v_{\text{OC}} - \ln(v_{\text{OC}} + 0.72)}{(v_{\text{OC}} + 1)} \right\} (1 - 1.1r_{\text{S}}) + 0.19r_{\text{S}}^2$$

$$\left\{ 1 - \frac{(v_{\text{OC}} + 0.7) \left\{ \frac{v_{\text{OC}} - \ln(v_{\text{OC}} + 0.72)}{v_{\text{OC}} + 1} \right\} (1 - 1.1r_{\text{S}}) + 0.19r_{\text{S}}^2}{v_{\text{OC}} r_{\text{P}}} \right\}$$

$$\left( 0 \leq r_{\text{S}} + \frac{1}{r_{\text{P}}} \leq 0.4 \right)$$

**(Eq. S3)**

## Supporting Figures and Tables

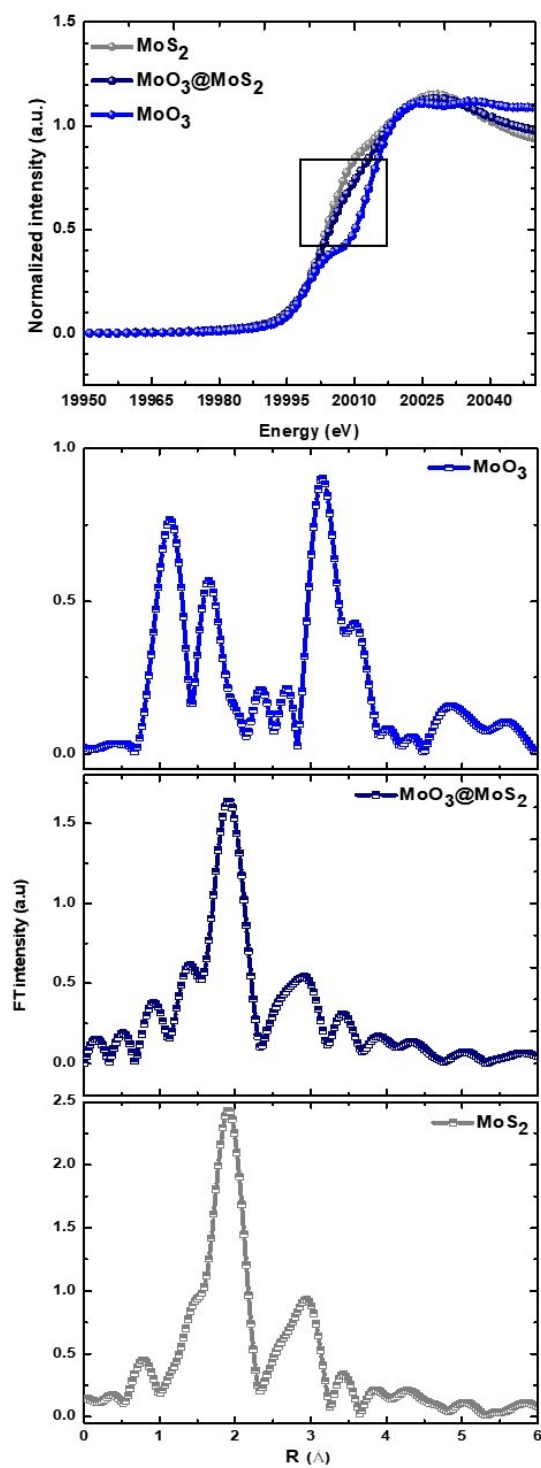

**Figure S1.** Mo K-edge (a) XANES and (b) FT-EXAFS spectra of MoS<sub>2</sub>, MoO<sub>3</sub>/MoS<sub>2</sub>, and MoO<sub>3</sub>.

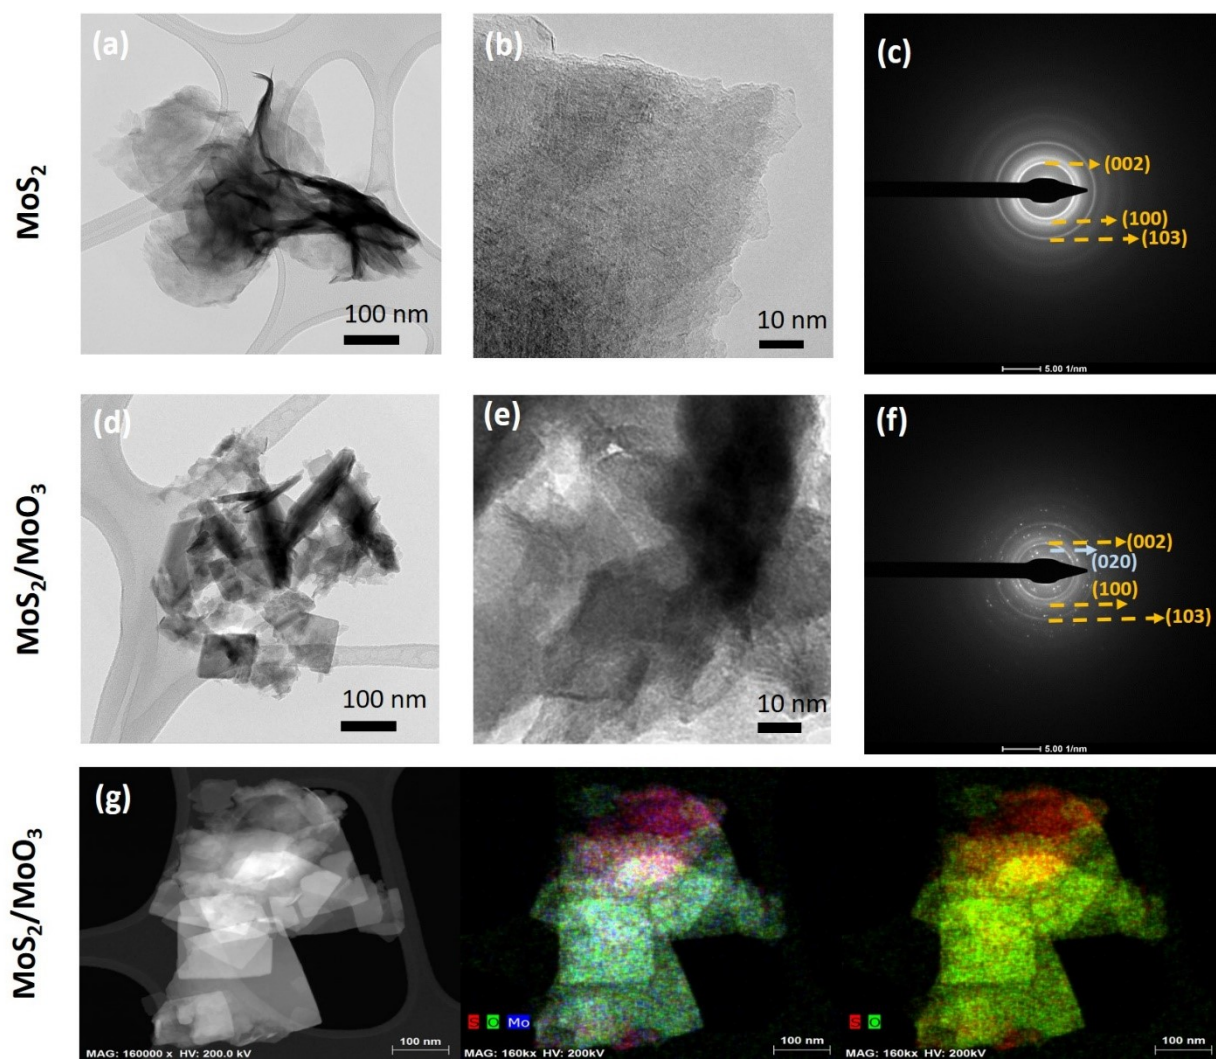

**Figure S2.** TEM images corresponding SAED pattern of (a–c)  $\text{MoS}_2$  and (d–f)  $\text{MoO}_3/\text{MoS}_2$ .  
 (g) TEM-EDS mapping of  $\text{MoO}_3/\text{MoS}_2$ .

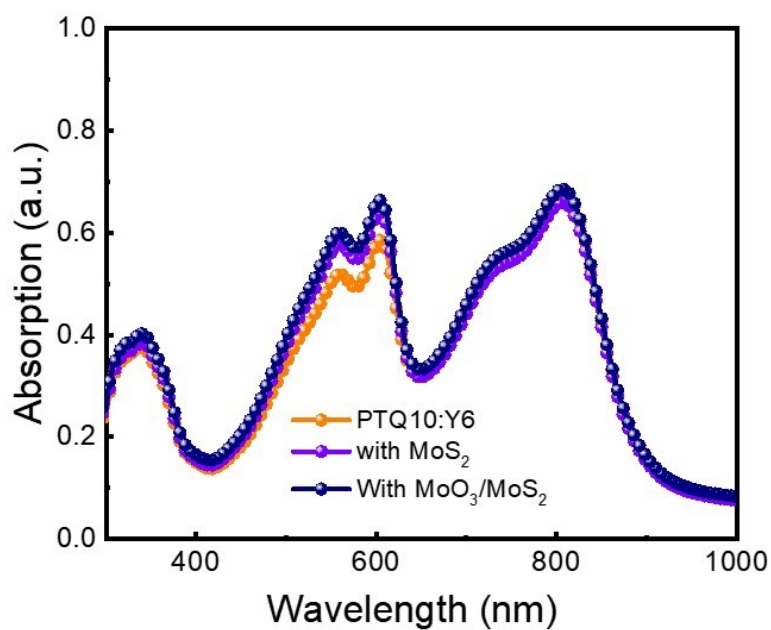

**Figure S3.** UV-vis absorption of PTQ10:Y6 OPVs doped with TMSs.

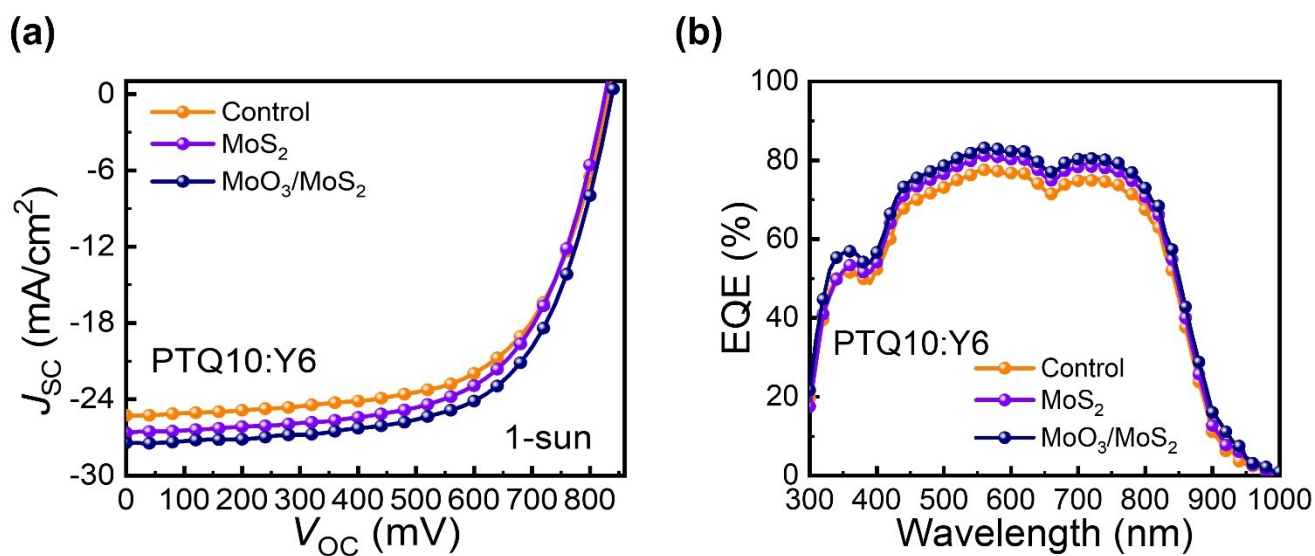

**Figure S4.** (a)  $J$ - $V$  curves and (b) EQE spectra of PTQ10:Y6 OPV devices.

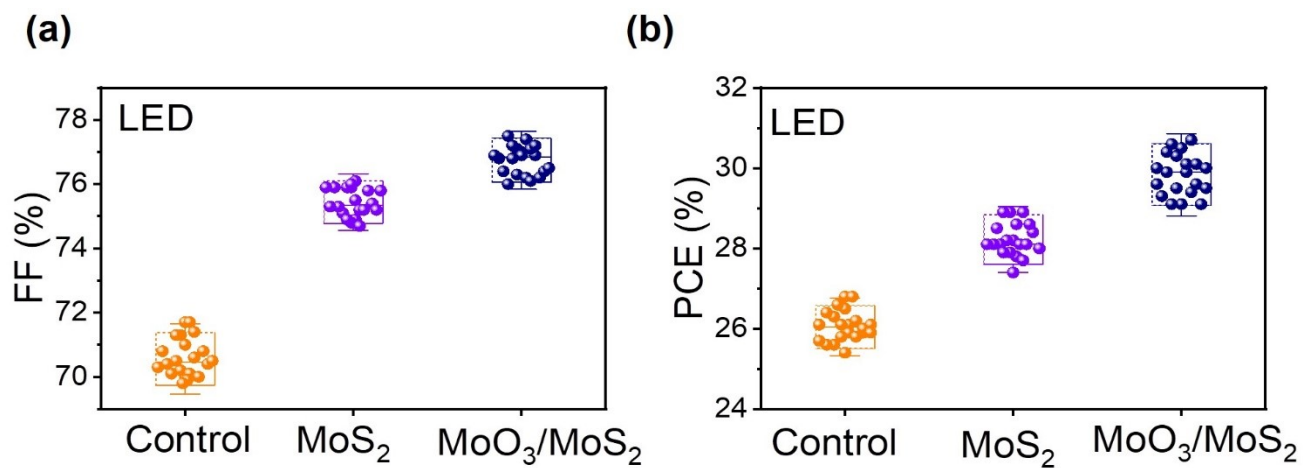

**Figure S5.** Statistics of photovoltaic parameters (FF and PCE) of OPVs under LED lamp.

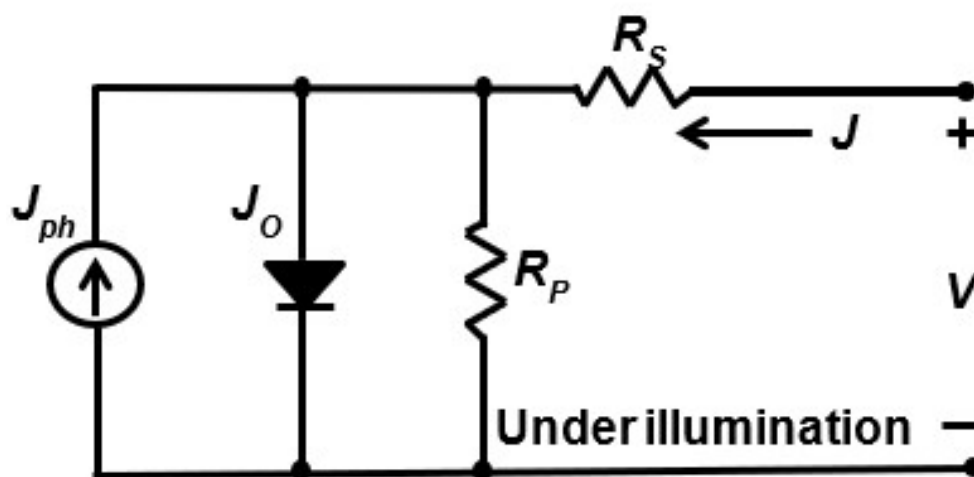

**Figure S6.** Single-diode equivalent circuit model.

**Table S1.** Parasitic resistances of OPVs under LED and 1-sun illumination conditions.

| Devices type                       | LED 1000-lx |        |          | 1-sun  |        |          |
|------------------------------------|-------------|--------|----------|--------|--------|----------|
|                                    | $r_S$       | $r_P$  | $R_{CH}$ | $r_S$  | $r_P$  | $R_{CH}$ |
| Control                            | 0.1206      | 29.363 | 115008   | 0.0149 | 0.6716 | 7048     |
| MoS <sub>2</sub>                   | 0.1169      | 48.472 | 109112   | 0.0166 | 0.7462 | 6790     |
| MoO <sub>3</sub> /MoS <sub>2</sub> | 0.1288      | 59.642 | 105071   | 0.0142 | 0.5971 | 6699     |

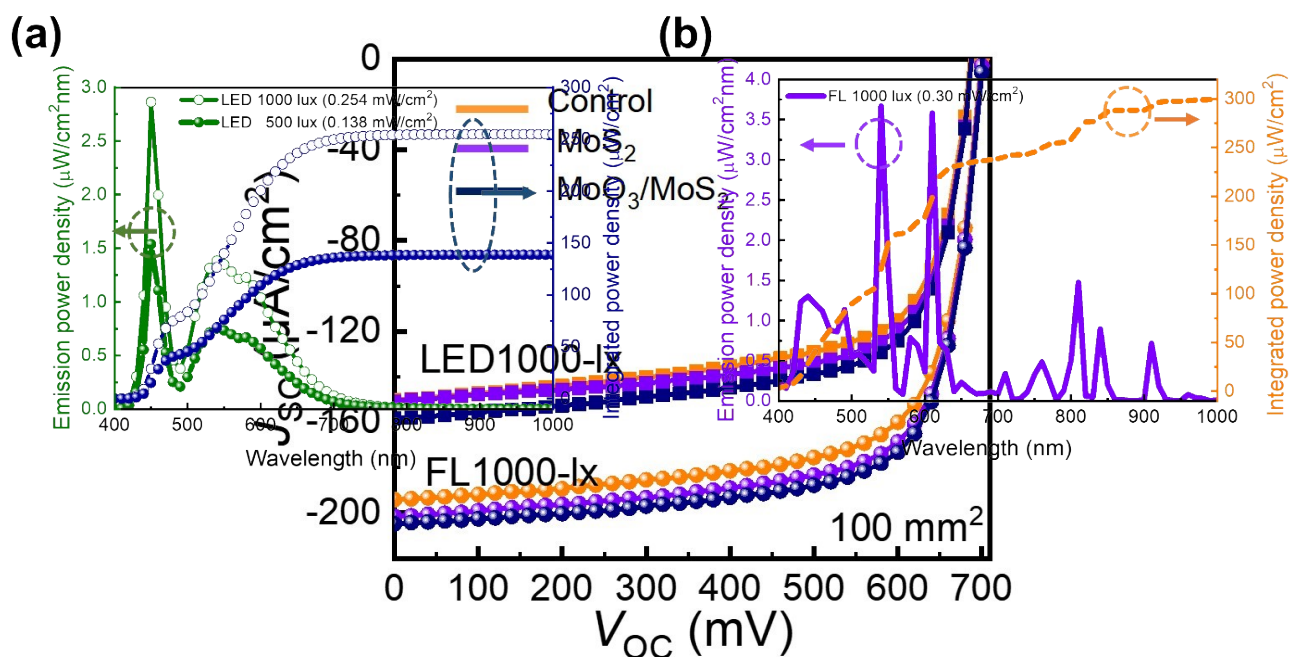

**Figure S7.**  $J-V$  curves of OPVs (area: 100 mm<sup>2</sup>) under LED and FL lamps.

**Figure S8.** Emission power and integrated power spectra of a LED and FL illumination.



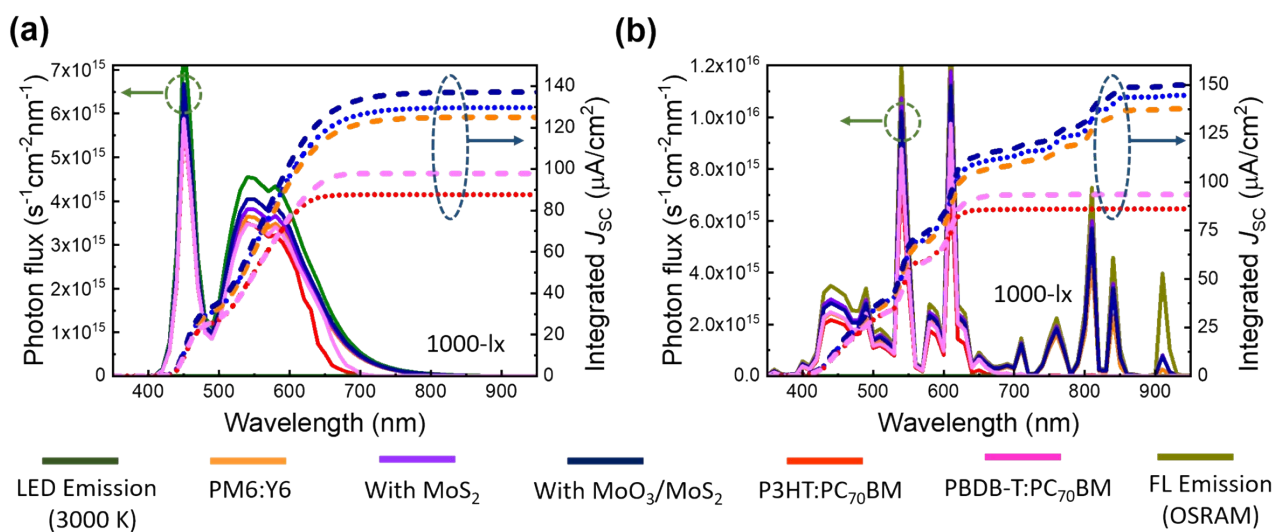

**Figure S9.** Photon flux and integrated  $J_{sc}$  of OPVs under LED and FL illumination.

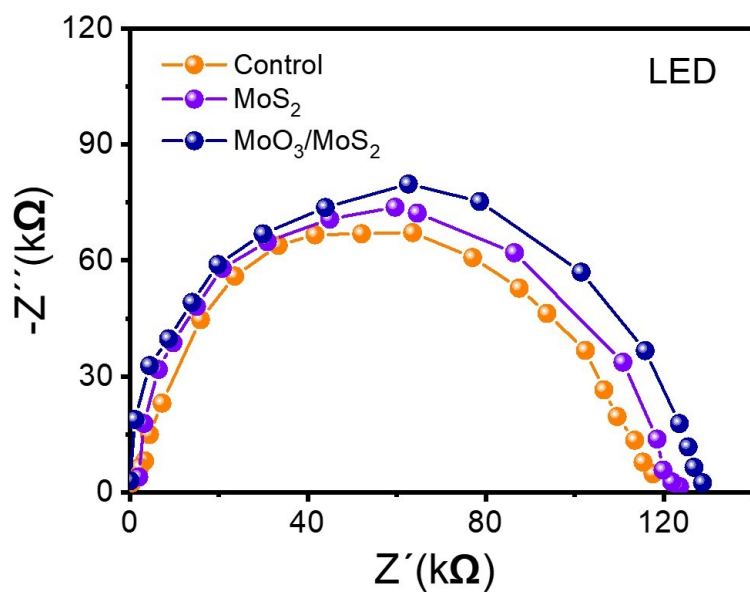

**Figure S10.** Electrochemical impedance spectroscopy (EIS) plot of OPV devices.

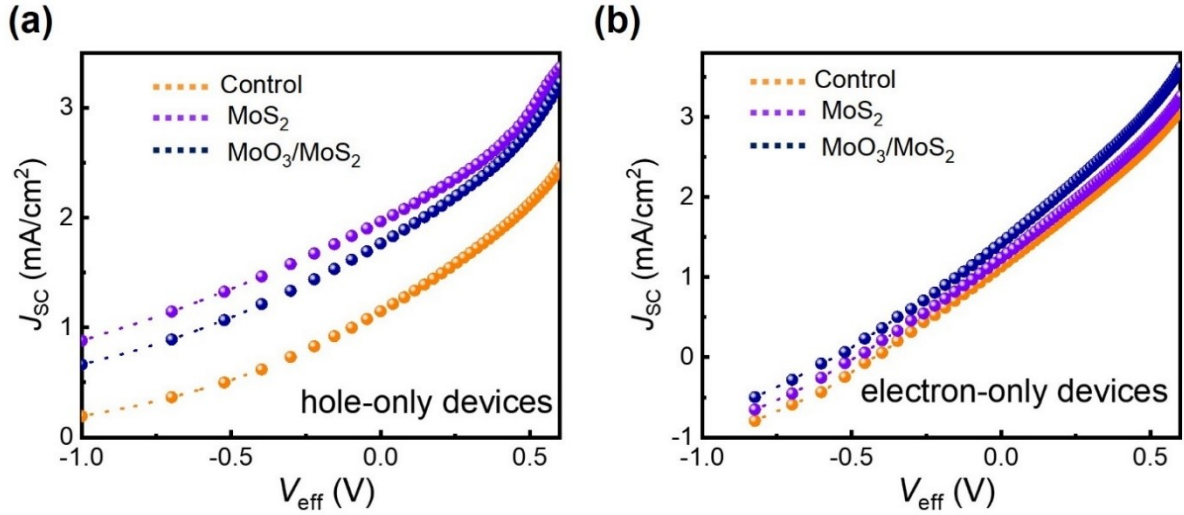

**Figure S11.** Fitted  $J$ - $V$  curves for charge mobilities. (a) hole-only devices. (b) electron-only devices.

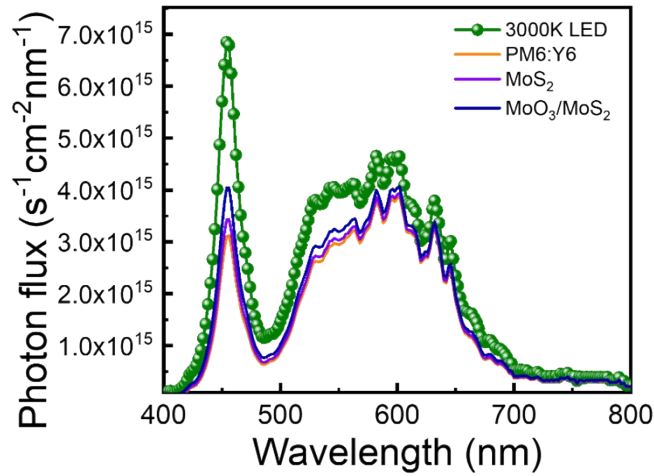

**Figure S12.** Spectral match of OPVs with LED illumination.

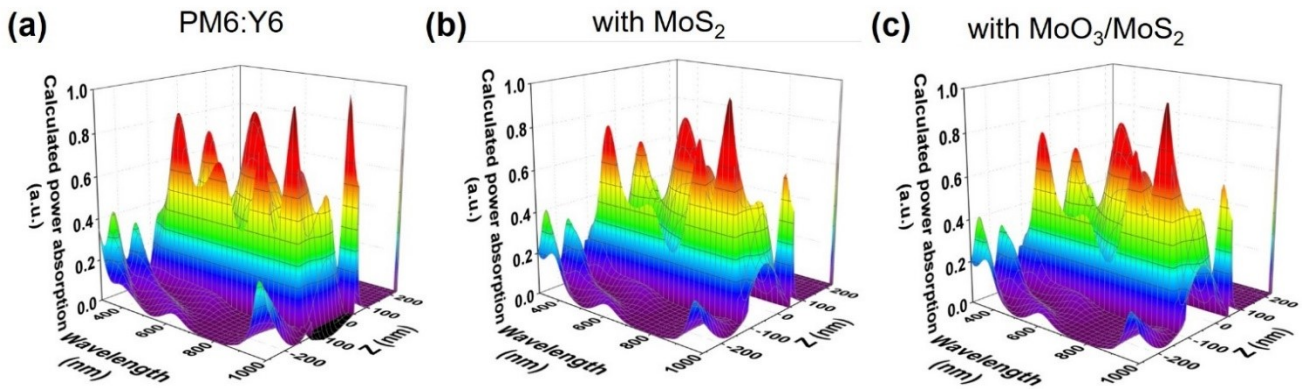

**Figure 13.** Power absorption density profiles of OPVs calculated using FDTD simulation.

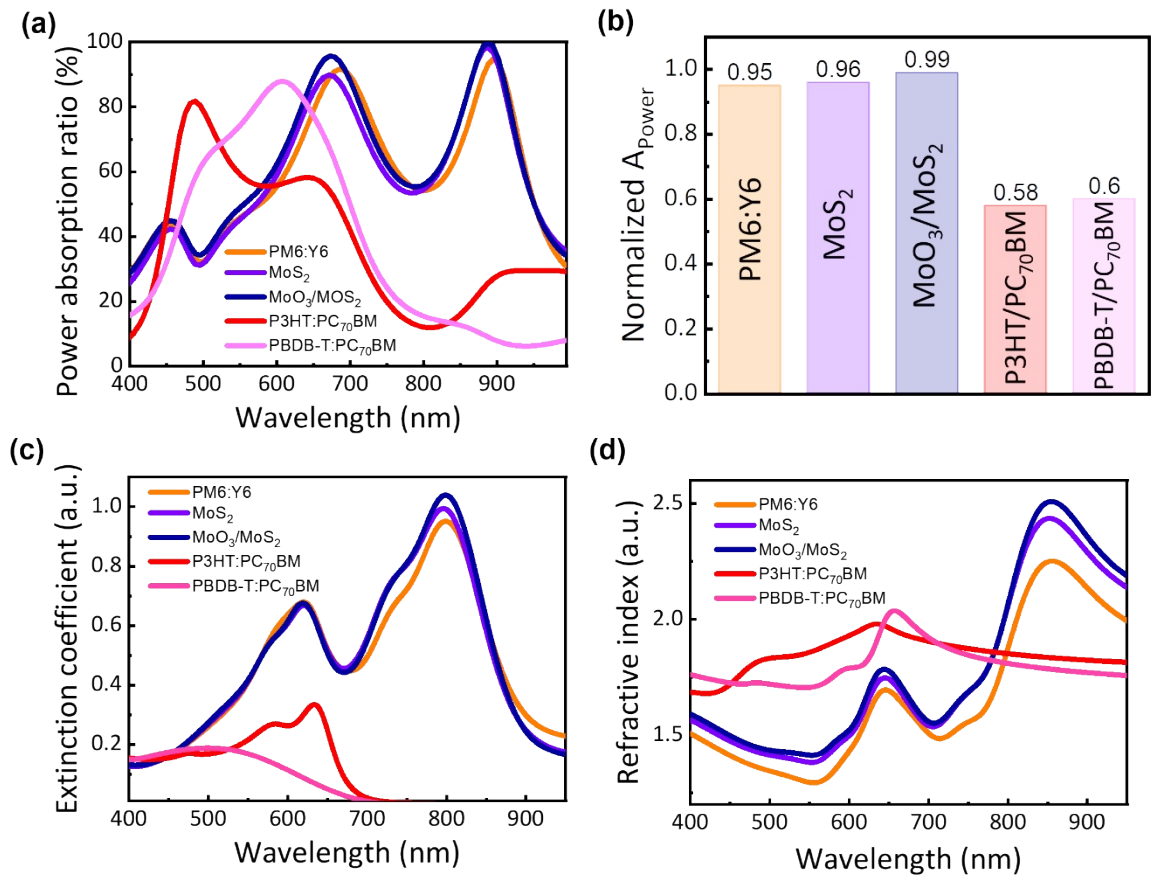

**Figure S14.** (a) Calculated power absorption ratios of OPVs with different active layers, (b) Normalized absorption power, (c) extinction coefficient, and (d) refractive index.

**Table S2.** A summary of recently reported photovoltaic performances under a halogen lamp (1000-lx).

| Ref       | Active layer                                    | $V_{oc}$<br>(mV) | $J_{sc}$<br>( $\mu\text{A}/\text{cm}^2$ ) | FF<br>(%) | $P_{max}$<br>( $\mu\text{W}/\text{cm}^2$ ) |
|-----------|-------------------------------------------------|------------------|-------------------------------------------|-----------|--------------------------------------------|
| [1]       | PDTBTBz-2F <sub>anti</sub> :PC <sub>71</sub> BM | 809              | 116.8                                     | 70.2      | 66.3                                       |
| [1]       | P3HT:PC <sub>71</sub> BM                        | 486              | 71.8                                      | 71.0      | 24.8                                       |
| [1]       | PBDB-T:PC <sub>71</sub> BM                      | 669              | 108.3                                     | 71.0      | 51.4                                       |
| [1]       | PTB7:PC <sub>71</sub> BM                        | 576              | 171.4                                     | 67.4      | 66.5                                       |
| [2]       | PBDB-T:IDIC                                     | 710              | 202.7                                     | 65.0      | 94.1                                       |
| [2]       | PBDB-T:IDICO1                                   | 770              | 252.4                                     | 66.0      | 102.1                                      |
| [2]       | PBDB-T:IDICO2                                   | 770              | 271.2                                     | 63.0      | 141.4                                      |
| [3]       | PM6:Y6                                          | 741              | 649.5                                     | 69.7      | 335.1                                      |
| [3]       | PM6:Y6:MXene                                    | 751              | 656.7                                     | 74.2      | 373.3                                      |
| [4]       | PM6:Y6                                          | 720              | 454.2                                     | 77.7      | 254.1                                      |
| [4]       | PM7:IT-4F                                       | 750              | 309.8                                     | 72.6      | 168.7                                      |
| [4]       | PTB7-Th:IEICO-4F                                | 630              | 403.2                                     | 69.8      | 177.3                                      |
| [5]       | PBDB-T: <i>m</i> -ITIC-O-EH                     | 711              | 198.7                                     | 64.9      | 95.6                                       |
| [5]       | PBDB-T: PC70BM                                  | 562              | 87.6                                      | 60.6      | 31.9                                       |
| [6]       | PM6:PM7:Y6:PCBM                                 | 708              | 551                                       | 73.1      | 280                                        |
| [7]       | PBDB-T:BTA3                                     | 1050             | 289.2                                     | 52.4      | 159.1                                      |
| [7]       | PBDB-TF:BTA3                                    | 1140             | 180.4                                     | 54.3      | 111.7                                      |
| [7]       | PBDB-TCl:BTA3                                   | 1180             | 138.2                                     | 43.6      | 71.1                                       |
| This work | PM6:Y6:MoS <sub>2</sub>                         | 755              | 683                                       | 77.1      | 397.5                                      |
| This work | PM6:Y6:MoO <sub>3</sub> /MoS <sub>2</sub>       | 761              | 692                                       | 78.1      | 412.2                                      |

**Table S3.** Ideal current densities of OPVs under 1000-lx LED lamp, calculated by FDTD simulation.

| 1000-lx LED ( $P_{in}$ : 0.254 mW/cm <sup>2</sup> ) |                                                              |                   |                  |  |
|-----------------------------------------------------|--------------------------------------------------------------|-------------------|------------------|--|
|                                                     |                                                              | Thickness<br>(nm) | $J_{ph}$ , ideal |  |
| Narrow bandgap<br>active layers                     | PM6:Y6                                                       | 151               | 140.7            |  |
|                                                     | with MoS <sub>2</sub>                                        | 150               | 149.9            |  |
|                                                     | with MoO <sub>3</sub> /MoS <sub>2</sub>                      | 149               | 153.6            |  |
| Wide bandgap<br>active layers                       | P3HT:ICBA                                                    | 150               | 109.2            |  |
|                                                     | P3HT:PC <sub>70</sub> BM                                     | 150               | 119.8            |  |
|                                                     | PBDB-T:PC <sub>70</sub> BM                                   | 150               | 127.1            |  |
|                                                     | P3HT:ICBA (actual thickness) <sup>[1]</sup>                  | 125               | 109.2            |  |
|                                                     | P3HT:PC <sub>70</sub> BM (actual thickness) <sup>[1]</sup>   | 150               | 121.1            |  |
|                                                     | PTB7:PC <sub>70</sub> BM (actual thickness) <sup>[1]</sup>   | 140               | 140.5            |  |
|                                                     | PBDB-T:PC <sub>70</sub> BM (actual thickness) <sup>[1]</sup> | 120               | 132.8            |  |

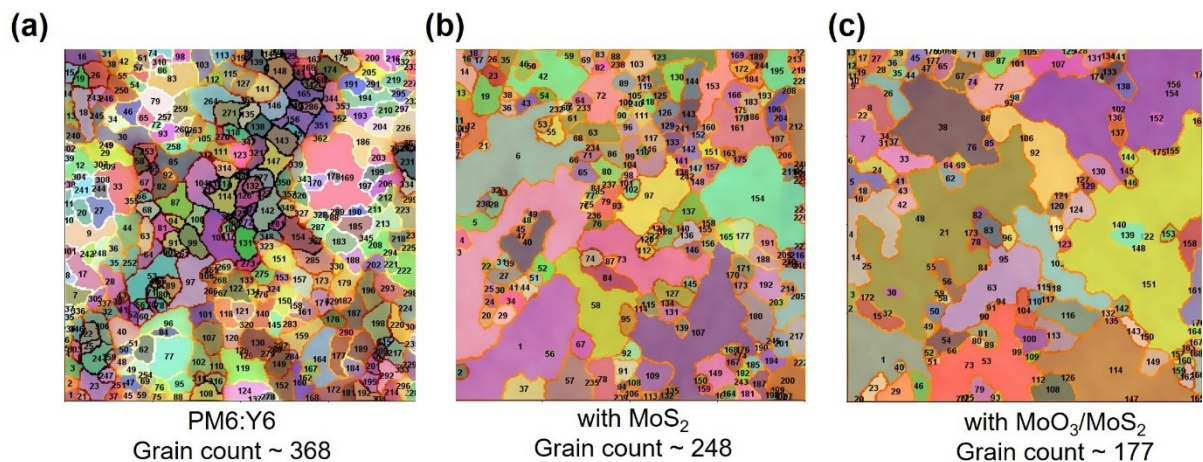

**Figure S15.** 2D AFM grain-count images of thin film blends measured by Watershed Algorithm.

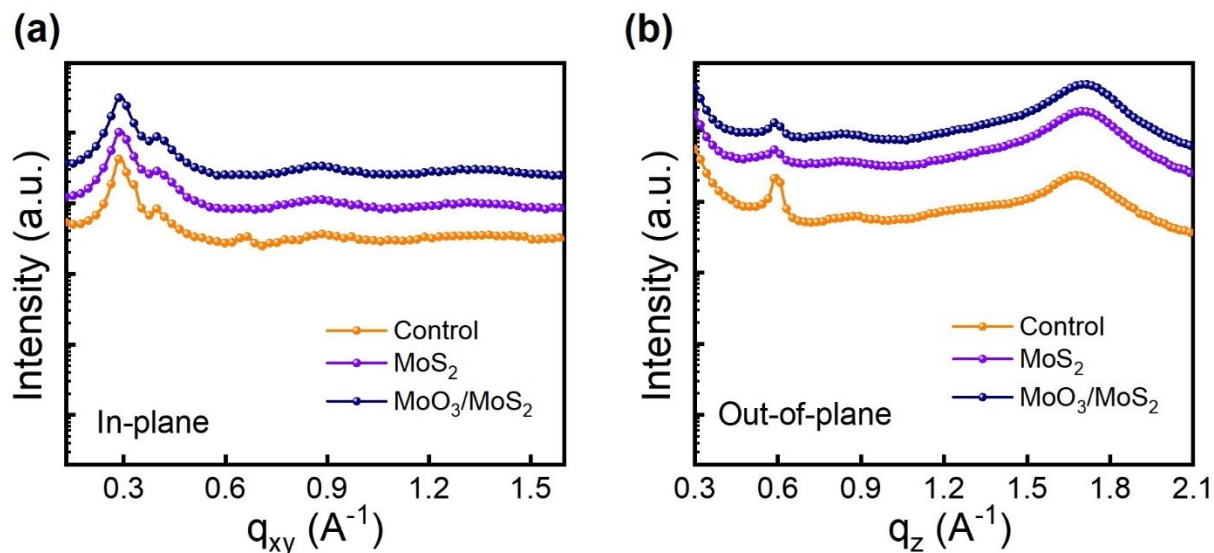

**Figure S16.** Intensity profiles of active layers blend. (a) In-plane direction. (b) Out-of-plane direction.

**Table S4.** Extracted parameters of active layers blend from GIWAXS measurements.

| Sample                             | Lamella stacking                                    |                                            |                          | $\pi$ - $\pi$ stacking              |                       |             |
|------------------------------------|-----------------------------------------------------|--------------------------------------------|--------------------------|-------------------------------------|-----------------------|-------------|
|                                    | <sup>a</sup> $q_{xy}(100)$<br>( $\text{\AA}^{-1}$ ) | <sup>b</sup> $d_{\text{lamellar}}$<br>(nm) | <sup>c</sup> CCL<br>(nm) | $q_z(010)$<br>( $\text{\AA}^{-1}$ ) | $d_{\pi-\pi}$<br>(nm) | CCL<br>(nm) |
| Control                            | 0.2262                                              | 22.75                                      | 70.98                    | 1.712                               | 3.75                  | 21.25       |
| MoS <sub>2</sub>                   | 0.2291                                              | 21.62                                      | 80.05                    | 1.724                               | 3.70                  | 22.90       |
| MoO <sub>3</sub> /MoS <sub>2</sub> | 0.2305                                              | 21.54                                      | 86.66                    | 1.739                               | 3.67                  | 23.54       |

<sup>a</sup>Peak position calculated from original GIWAXS data

<sup>b</sup>Intermolecular distance  $d = 2\pi/q$

<sup>c</sup>Crystal coherence length ( $L_C$ ) was calculated using the Scherrer equation,  $L_C = 2\pi K/\text{FWHM}$ .

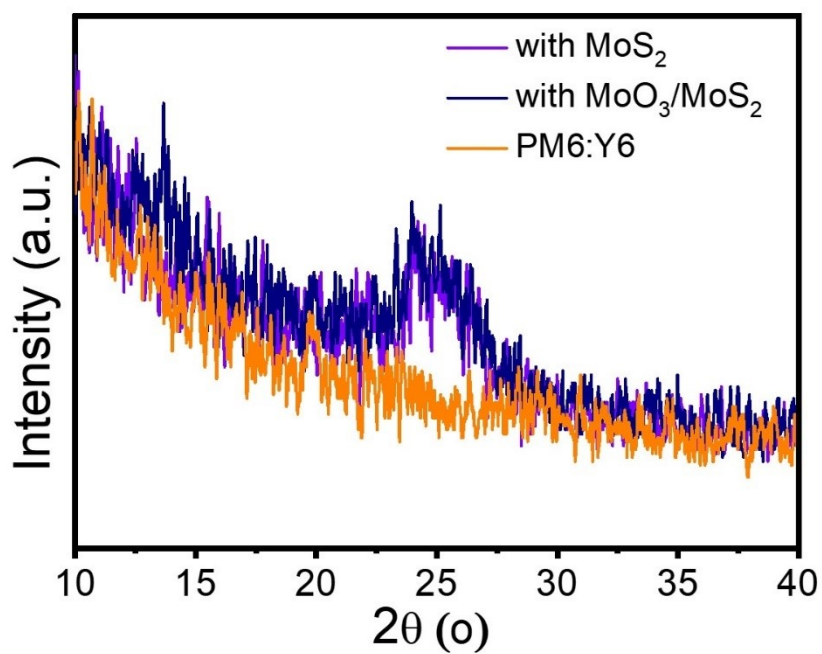

**Figure S17.** XRD figure of OPVs.



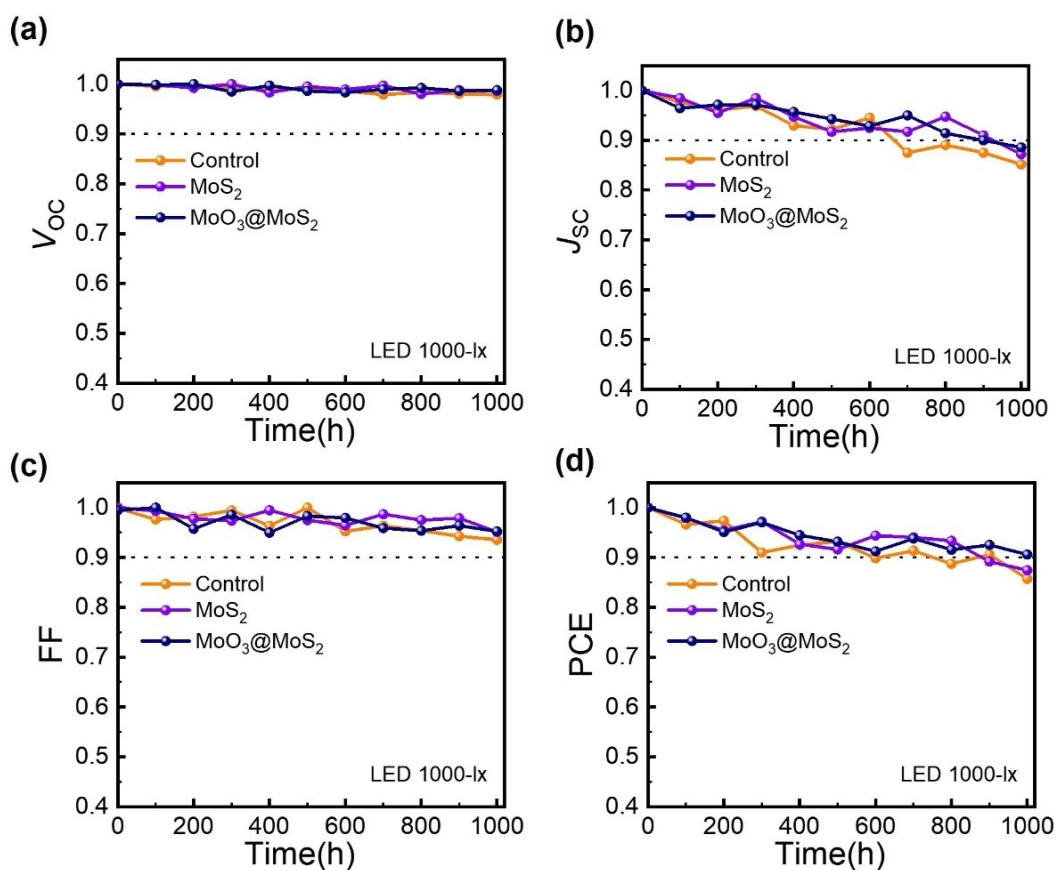

**Figure S18.** Stability of OPVs measured under LED illumination.

## References

- [1] Y. J. You, C. E. Song, Q. V. Hoang, Y. Kang, J. S. Goo, D. H. Ko, J. J. Lee, W. S. Shin, J. W. Shim, *Adv Funct Mater* **2019**, *29*, 1.
- [2] H. S. Ryu, H. G. Lee, S. C. Shin, J. Park, S. H. Kim, E. J. Kim, T. J. Shin, J. W. Shim, B. J. Kim, H. Y. Woo, *J Mater Chem A Mater* **2020**, *8*, 23894.
- [3] M. A. Saeed, T. H. Kim, H. Ahn, N. W. Park, J. H. Park, H. Choi, A. Shahzad, J. W. Shim, *Adv Opt Mater* **2022**, *2202135*, 1.
- [4] Z. Chen, H. Yin, Z. Wen, S. K. So, X. Hao, *Sci Bull (Beijing)* **2021**, *66*, 1641.
- [5] M. A. Saeed, S. Cheng, S. Biswas, S. H. Kim, S. K. Kwon, H. Kim, Y. H. Kim, J. W. Shim, *J Power Sources* **2022**, *518*, 230782.
- [6] T. H. Kim, H. J. Lee, M. A. Saeed, J. H. Son, H. Y. Woo, T. G. Kim, J. W. Shim, *Adv Funct Mater* **2022**, *2201921*, 1.
- [7] Z. Chen, T. Wang, Z. Wen, P. Lu, W. Qin, H. Yin, X. T. Hao, *ACS Energy Lett* **2021**, *6*, 3203.
